# Supplementary material for: A urinary Common Rejection Module (uCRM) score for non-invasive kidney transplant monitoring
Source: PubMed Central journal article supplement (PMC6668802; doi:10.1371/journal.pone.0220052), 2019-07-31

**Supplemental Figure S1. Interaction network analysis of CRM genes.** A network view of the CRM genes.

Cross-hatched bubbles are the CRM genes while solid bubbles indicate partners identified through network analysis. Connections are color-coded based on the type of interaction. Red, physical interaction; purple, co-expression; orange, predicted; blue, co-localization; turquoise, pathway; green, genetic interactions; yellow, shared protein domains.

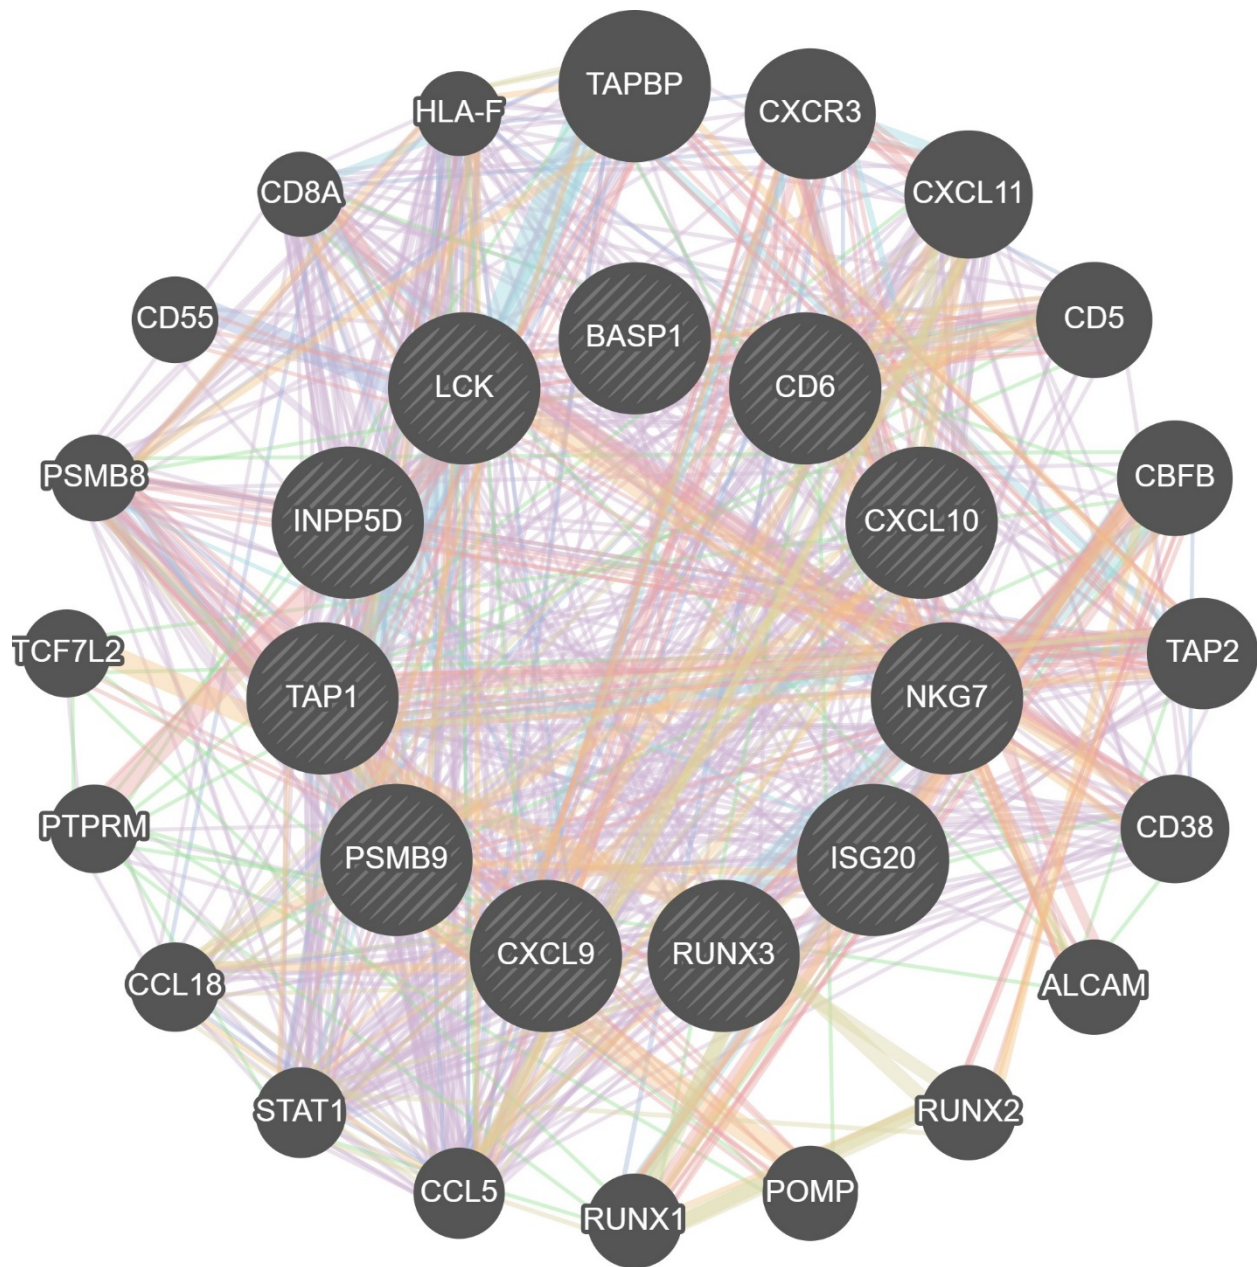

Supplement: pone.0220052.s001.pdf [file pone.0220052.s001.pdf]
