# Supplementary material for: A urinary Common Rejection Module (uCRM) score for non-invasive kidney transplant monitoring
Source: PubMed Central journal article supplement (PMC6668802; doi:10.1371/journal.pone.0220052), 2019-07-31

**Supplemental Figure S2. uCRM score classification performance inclusive of BKVN phenotype.** A. ROC curve of the uCRM score in discriminating between AR and the combination of bAR and STA phenotypes (AUC = 0.9677,  $P < 0.0001$ ). B. Scatter dot plot of the uCRM score for AR, bAR, STA, and BKVN phenotypes. Significance was determined by nonparametric Kruskal-Wallis test with Dunn's multiple comparisons correction. C. ROC curve of the uCRM score in discriminating between AR and the combination of bAR and STA phenotypes (AUC = 0.9111,  $P < 0.0001$ ). \*  $< 0.05$ . \*\*  $< 0.01$ . \*\*\*  $P < 0.001$ . \*\*\*\*  $P < 0.0001$ .

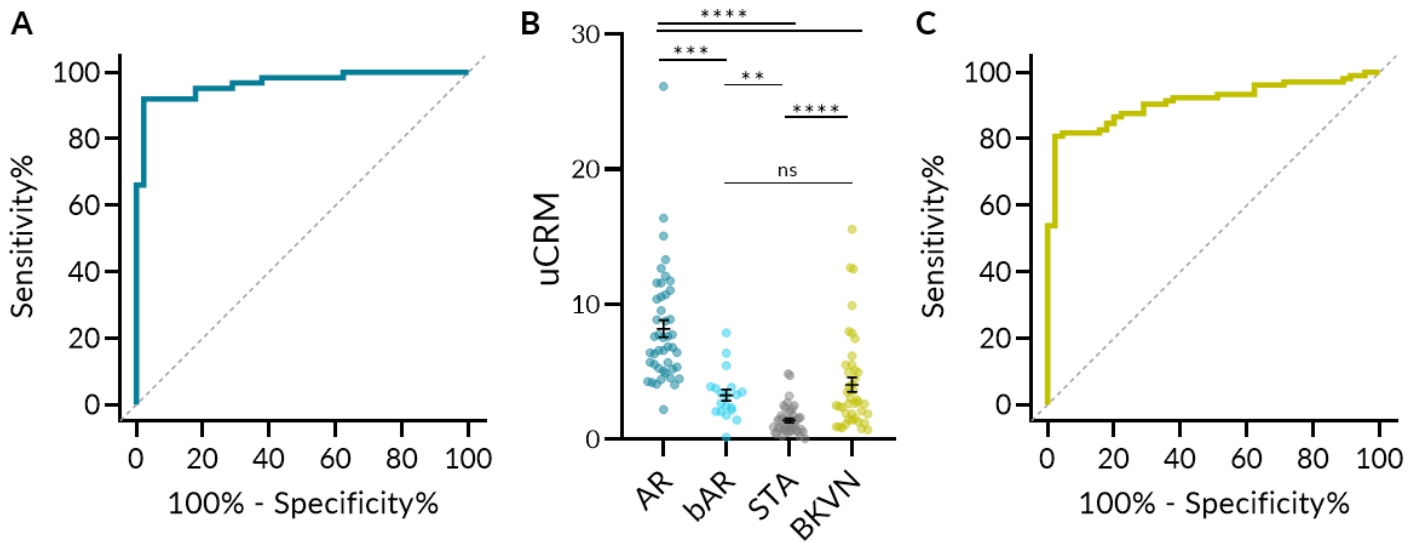

Supplement: pone.0220052.s002.pdf [file pone.0220052.s002.pdf]
