# Supplementary material for: A urinary Common Rejection Module (uCRM) score for non-invasive kidney transplant monitoring
Source: PubMed Central journal article supplement (PMC6668802; doi:10.1371/journal.pone.0220052), 2019-07-31

**Supplemental Figure S3. Lack of Association of uCRM Score with Additional Histological Parameters.** The correlation between the uCRM score and various histological parameters was determined. Other than the tubulitis (t) and interstitial inflammation (ii) scores that were significantly correlated (**Figure 5A and 5B**), none of tubular atrophy (ta), glomerulosclerosis (gs), mesangial matrix (mm), intimal proliferation (cv), medial arteriolar hyaline (ah), tubular vacuolization (tv), arteritis (v), or acute glomerulitis (g) scores were significantly correlated.

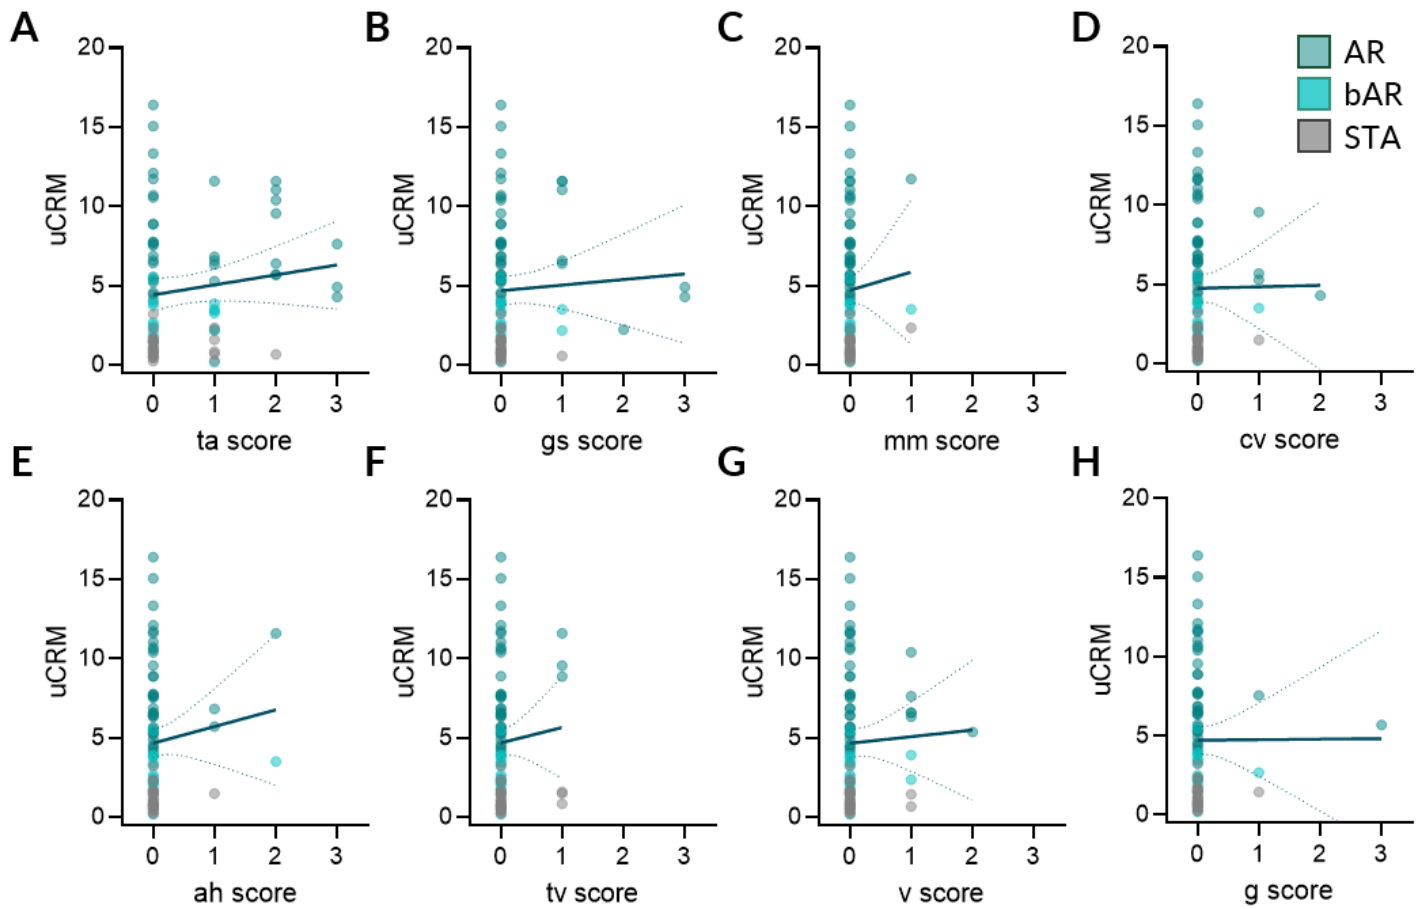

Supplement: pone.0220052.s003.pdf [file pone.0220052.s003.pdf]
