# Supplementary material for: A urinary Common Rejection Module (uCRM) score for non-invasive kidney transplant monitoring
Source: PubMed Central journal article supplement (PMC6668802; doi:10.1371/journal.pone.0220052), 2019-07-31
Supplement: pone.0220052.s004.pdf [file pone.0220052.s004.pdf]

**Supplemental Table S1: Primer information for primers used for uCRM assay**

| <b>Vendor</b>            | <b>Catalog no.</b> | <b>Item no.</b> | <b>Gene Symbol</b> |
|--------------------------|--------------------|-----------------|--------------------|
| Thermo Fisher Scientific | 4331182            | Hs00234720_g1   | BASP1              |
| Thermo Fisher Scientific | 4331182            | Hs00171042_m1   | CXCL10             |
| Thermo Fisher Scientific | 4331182            | Hs00171065_m1   | CXCL9              |
| Thermo Fisher Scientific | 4331182            | Hs00183290_m1   | INPP5D             |
| Thermo Fisher Scientific | 4331182            | Hs00158122_m1   | ISG20              |
| Thermo Fisher Scientific | 4331182            | Hs00178427_m1   | LCK                |
| Thermo Fisher Scientific | 4331182            | Hs01120688_g1   | NKG7               |
| Thermo Fisher Scientific | 4331182            | Hs00544762_m1   | PSMB9              |
| Thermo Fisher Scientific | 4331182            | Hs00231709_m1   | RUNX3              |
| Thermo Fisher Scientific | 4331182            | Hs00388675_m1   | TAP1               |
| Thermo Fisher Scientific | 4331182            | Hs00198752_m1   | CD6                |
| Thermo Fisher Scientific | 4331182            | Hs03003631_g1   | 18S <sup>A</sup>   |

<sup>A</sup>Reference gene
